# Supplementary material for: Sentiment analysis of epidemiological surveillance reports on COVID-19 in Greece using machine learning models
Source: Frontiers journal article supplement (doi:10.3389/fpubh.2023.1191730), 2023-07-18
Supplement: Data_Sheet_1.pdf [file Data_Sheet_1.pdf]

## *Supplementary Material*

### **Sentiment Analysis of Epidemiological Surveillance Reports On COVID-19 In Greece Using Machine Learning Models**

**Christos Stefanis, Elpida Giorgi, Konstantinos Kalentzis, Athanasios Tselemonis, Evangelia Nena, Christina Tsigalou, Christos Kontogiorgis, Yiannis Kourkoutas, Aikaterini Chatzaki, Ioannis Dokas, Theodoros Constantinidis and Eugenia Bezirtzoglou\***

**\* Correspondence:** Eugenia Bezirtzoglou:empezirt@yahoo.gr

**Supplement 1.** Sentiment analysis and public health

du, solidu, sakratu, ...  
 runing, ...  
 ri, Ikusmiratu, ...  
 ri izan, usnatu  
 pseudo. Sasi-  
 pseudonym. Izengoit, izenor-  
 de.  
 psychoanalysis. Psikoanalisi.  
 psychologist. Psikologo.  
 psychology. Psikologia.  
 ... Psikonata.

[illegible]

**b) conceptual analysis and science mapping (co-occurrence analysis)**

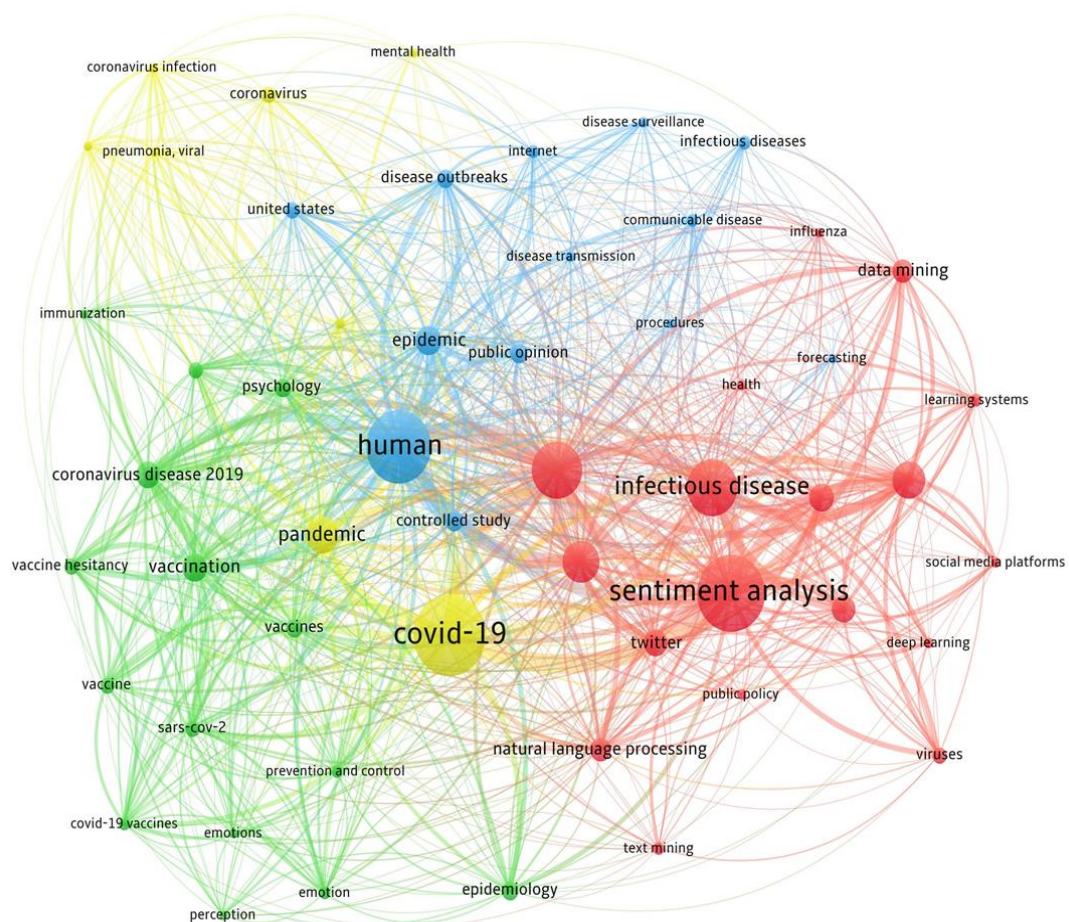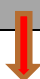

### c) sentiment analysis, work applied and applications

| Sentiment analysis applications                                                                                                                                                                                   | Work applied                                                                                 | Research paper                                                                                                                             |
|-------------------------------------------------------------------------------------------------------------------------------------------------------------------------------------------------------------------|----------------------------------------------------------------------------------------------|--------------------------------------------------------------------------------------------------------------------------------------------|
| <ul style="list-style-type: none"> <li>monitoring mass gatherings during a pandemic</li> </ul>                                                                                                                    | Mobile-Health applications                                                                   | A Proposed Framework for Developing User-Centred Mobile Healthcare Applications for the Biggest Annual Mass Gathering (Hajj) Post COVID-19 |
| <ul style="list-style-type: none"> <li>estimate disease incidences for the current week (nowcasting) considering the social media data and the disease case counts reported by the Government agencies</li> </ul> | Digital epidemiology/disease epidemics                                                       | A Social Media Time-Series Data Analytics Approach for Digital Epidemiology                                                                |
| <ul style="list-style-type: none"> <li>sentiment changes in COVID-19-related tweets and public health policies and events</li> </ul>                                                                              | Build a surveillance system for monitoring people's attitudes towards public health policies | Analyzing Twitter Data to Evaluate People's Attitudes towards Public Health Policies and Events in the Era of COVID-19                     |
| <ul style="list-style-type: none"> <li>measure the spatio-temporal sentiment towards a new vaccine</li> </ul>                                                                                                     | Measuring population health behaviors over time and space                                    | Assessing Vaccination Sentiments with Online Social Media: Implications for Infectious Disease Dynamics and Control                        |
| <ul style="list-style-type: none"> <li>extract knowledge regarding infectious diseases, their symptoms, or poor environment conditions what promote the propagation of these diseases</li> </ul>                  | CollaborativeHealth, an infodemiology platform                                               | CollaborativeHealth: Smart technologies to Surveil Outbreaks of Infectious Diseases Through Direct and Indirect Citizen Participation      |
| <ul style="list-style-type: none"> <li>identify and extract disease symptoms and their associations</li> </ul>                                                                                                    | Biomedical text analytics system, DiseaSE (Disease Symptom Extraction)                       | DiseaSE: A biomedical text analytics system for disease symptom extraction and characterization                                            |
| <ul style="list-style-type: none"> <li>user behavioral patterns on the web</li> </ul>                                                                                                                             | A social media based mosquito-borne disease surveillance and outbreak management             | Effective surveillance and predictive mapping of mosquito-borne diseases using social media                                                |
| <ul style="list-style-type: none"> <li>predict infectious disease such as influenza-like illness (ILI) outbreaks using Twitter data</li> </ul>                                                                    | Infectious Disease Prediction                                                                | Evaluation of IBM Watson Natural Language Processing Service to predict influenza-like illness outbreaks from Twitter data                 |
| <ul style="list-style-type: none"> <li>public sentiment related to COVID-19 vaccines</li> </ul>                                                                                                                   | Real-time analysis of large bodies of text related to disease outbreaks and vaccination      | Fine-tuned Sentiment Analysis of COVID-19 Vaccine-Related Social Media Data: Comparative Study                                             |
| <ul style="list-style-type: none"> <li>identifies and characterizes user-generated messages related to opioid abuse, heroin injection drug use, and HIV status</li> </ul>                                         | Infoveillance                                                                                | Identification and characterization of tweets related to the 2015 Indiana HIV outbreak: A retrospective infoveillance study                |
| <ul style="list-style-type: none"> <li>identifying the infectious or recovered period of flu cases through social media</li> </ul>                                                                                | Epidemic control and prevention in real time                                                 | Infectious or Recovered? Optimizing the Infectious Disease Detection Process for Epidemic Control and Prevention Based on Social Media     |
| <ul style="list-style-type: none"> <li>detect the emergence of diseases, particularly influenza-like illnesses, and foster disease surveillance</li> </ul>                                                        | Disease classification                                                                       | Influenza-like Illness Detection from Arabic Facebook Posts Based on                                                                       |

|                                                                                                                                                                                                                                                                |                                                                               |                                                                                                                                                                                             |
|----------------------------------------------------------------------------------------------------------------------------------------------------------------------------------------------------------------------------------------------------------------|-------------------------------------------------------------------------------|---------------------------------------------------------------------------------------------------------------------------------------------------------------------------------------------|
| systems                                                                                                                                                                                                                                                        |                                                                               | sentiment Analysis and 1D convolutional Neural Network                                                                                                                                      |
| <ul style="list-style-type: none"> <li>information-seeking patterns during pandemics such as COVID-19 using Google Trends</li> </ul>                                                                                                                           | Infodemiology                                                                 | Information-Seeking Patterns During the COVID-19 Pandemic Across the United States: Longitudinal Analysis of Google Trends Data                                                             |
| <ul style="list-style-type: none"> <li>disease outbreaks that occur overseas avian influenza A(H7N9)</li> </ul>                                                                                                                                                | Disease surveillance and public sensing                                       | Leveraging social networking sites for disease surveillance and public sensing: the case of the 2013 avian influenza A(H7N9) outbreak in China                                              |
| <ul style="list-style-type: none"> <li>content analysis and information surveillance</li> </ul>                                                                                                                                                                | Infodemiology                                                                 | Main uses of Instagram in oral health research—A scoping review                                                                                                                             |
| <ul style="list-style-type: none"> <li>patient online review</li> </ul>                                                                                                                                                                                        | Fading topics and sentiment trends in physician rating websites               | Mining topic and sentiment dynamics in physician rating websites during the early wave of the COVID-19 pandemic: Machine learning approach                                                  |
| <ul style="list-style-type: none"> <li>the spread of influenza can be predicted with high accuracy</li> <li>monitor the spread of influenza in selected cities in real-time.</li> </ul>                                                                        | Detecting and monitoring diseases in real time                                | Mining Twitter Data For Influenza Detection and Surveillance                                                                                                                                |
| <ul style="list-style-type: none"> <li>social, medical, public health and technology sciences.</li> </ul>                                                                                                                                                      | Vaccine hesitancy                                                             | Multi-perspectives systematic review on the applications of sentiment analysis for vaccine hesitancy                                                                                        |
| <ul style="list-style-type: none"> <li>predict the possible number of cases with H1N1 disease</li> </ul>                                                                                                                                                       | Integrated Disease Surveillance Program                                       | Prediction of Influenza-like Illness from Twitter Data and Its Comparison with Integrated Disease Surveillance Program Data                                                                 |
| <ul style="list-style-type: none"> <li>drug abuse epidemiology</li> </ul>                                                                                                                                                                                      | Development of a novel semantic web platform                                  | PREDOSE: A semantic web platform for drug abuse epidemiology using social media                                                                                                             |
| <ul style="list-style-type: none"> <li>weekly flu rate predictions</li> </ul>                                                                                                                                                                                  | Track disease outbreaks and provide early warnings, even for newest outbreaks | Preliminary Flu Outbreak Prediction Using Twitter Posts Classification and Linear Regression With Historical Centers for Disease Control and Prevention Reports: Prediction framework Study |
| <ul style="list-style-type: none"> <li>emotional response of Moroccan citizens to COVID-19 pandemic and its effects</li> </ul>                                                                                                                                 | Decision-making assistance tool for COVID-19 mitigation and management        | Real-Time Infection Surveillance of Moroccan Social Media Users' Sentiments towards the COVID-19 Pandemic and Its Management                                                                |
| <ul style="list-style-type: none"> <li>identify emotions in social media conversations about COVID-19</li> </ul>                                                                                                                                               | Public health surveillance                                                    | Rise and fall of the global conversation and shifting sentiments during the COVID-19 pandemic                                                                                               |
| <ul style="list-style-type: none"> <li>identify the locations of disease outbreaks</li> </ul>                                                                                                                                                                  | Public health surveillance                                                    | Sentiment Analysis as a Service: A social media based sentiment analysis framework                                                                                                          |
| <ul style="list-style-type: none"> <li>sentiment analysis to document patients' experience and emotional distress of dermatological diseases (alopecia areata (AA), hidradenitis suppurativa HS), and psoriasis (PsO) in comparison to fibromyalgia</li> </ul> | Identify patients' experiences of skin disease                                | Sentiment analysis of tweets on alopecia areata, hidradenitis suppurativa, and psoriasis: Revealing the patient experience                                                                  |

|                                                                                                                                                                                                                                       |                                                                                                                |                                                                                                                                                    |
|---------------------------------------------------------------------------------------------------------------------------------------------------------------------------------------------------------------------------------------|----------------------------------------------------------------------------------------------------------------|----------------------------------------------------------------------------------------------------------------------------------------------------|
| (FM)                                                                                                                                                                                                                                  |                                                                                                                |                                                                                                                                                    |
| <ul style="list-style-type: none"> <li>reporting of SARS-CoV-2 outbreak status</li> </ul>                                                                                                                                             | Develop reliable early information surveillance and warning system for pandemic outbreaks                      | Sentiment-Based Spatiotemporal Prediction Framework for Pandemic Outbreaks Awareness Using Social Networks Data Classification                     |
| <ul style="list-style-type: none"> <li>management of the pandemic and its waves might actually represent a novel preventive approach to hinder emotional contagion, disseminating reliable information and nurturing trust</li> </ul> | COVID-19 emotional contagion surveillance                                                                      | Surveilling COVID-19 Emotional Contagion on Twitter by Sentiment Analysis                                                                          |
| <ul style="list-style-type: none"> <li>flu prediction/detection</li> </ul>                                                                                                                                                            | Flu disease surveillance systems                                                                               | Text Classification of Flu-related Tweets Using FastText with Sentiment and Keyword Features                                                       |
| <ul style="list-style-type: none"> <li>surveillance of mosquito-borne diseases</li> <li>disease classification with demographic variables</li> <li>detection prediction</li> <li>public awareness</li> </ul>                          | Decision making-mosquito surveillance programs                                                                 | Text mining in mosquito-borne disease: A systematic review                                                                                         |
| <ul style="list-style-type: none"> <li>identification of the main topics posted by Twitter users related to the COVID-19 pandemic.</li> </ul>                                                                                         | Infoveillance                                                                                                  | Top Concerns of Tweeters During the COVID-19 Pandemic: Infoveillance Study                                                                         |
| <ul style="list-style-type: none"> <li>Identification of dominant themes, topics, sentiments, and changing trends in tweets about the COVID-19 pandemic</li> </ul>                                                                    | Infoveillance                                                                                                  | Topics, Trends, and Sentiments of Tweets About the COVID-19 Pandemic: Temporal Infoveillance Study                                                 |
| <ul style="list-style-type: none"> <li>detecting influenza epidemics using Twitter</li> </ul>                                                                                                                                         | Infectious Disease Prediction and early warning                                                                | Twitter Catches The Flu: Detecting Influenza Epidemics using Twitter                                                                               |
| <ul style="list-style-type: none"> <li>public concern about epidemics</li> </ul>                                                                                                                                                      | Monitoring public health concerns                                                                              | Twitter sentiment classification for measuring public health concerns                                                                              |
| <ul style="list-style-type: none"> <li>surveillance</li> </ul>                                                                                                                                                                        | Using Twitter as a means of surveillance for public health crises and specifying groups or populations at risk | Using a mixed methods approach to identify public perception of vaping risks and overall health outcomes on Twitter during the 2019 EVALI outbreak |
| <ul style="list-style-type: none"> <li>produce national flu forecasts for the United States</li> </ul>                                                                                                                                | Influenza forecasting using electronic health records (EHR) and in Internet users' search activity             | Using electronic health records and Internet search information for accurate influenza forecasting                                                 |
